# Supplementary material
Source: PubMed Central journal article supplement (PMC7497843)
Supplement: NIHMS1618287-supplement-supplementary.pdf [file NIHMS1618287-supplement-supplementary.pdf]

## Supplementary

**Table S1** Comparison of selected baseline characteristics between participants who received and did not receive chemotherapy within strata of race/ethnicity in the propensity score weighted cohort

| Variable                        | Non-Hispanic White                   |                            |           | Non-Hispanic Black                   |                            |           |
|---------------------------------|--------------------------------------|----------------------------|-----------|--------------------------------------|----------------------------|-----------|
|                                 | No/discordant chemotherapy (N=3,345) | Yes chemotherapy (N=3,383) | Std. Diff | No/discordant chemotherapy (N=3,345) | Yes chemotherapy (N=3,383) | Std. Diff |
| <b>Stage</b>                    |                                      |                            |           |                                      |                            |           |
| I                               | 520 (30.82)                          | 524 (30.59)                | 0.005     | 394 (23.8)                           | 410 (24.55)                | 0.018     |
| II                              | 838 (49.67)                          | 816 (47.64)                | 0.041     | 869 (52.46)                          | 819 (49.04)                | 0.068     |
| III                             | 263 (15.56)                          | 318 (18.56)                | 0.080     | 287 (17.31)                          | 342 (20.48)                | 0.081     |
| IV                              | 67 (3.95)                            | 55 (3.21)                  | 0.040     | 107 (6.44)                           | 99 (5.93)                  | 0.021     |
| <b>Surgery</b>                  |                                      |                            |           |                                      |                            |           |
| None                            | 35 (2.1)                             | 36 (2.1)                   | 0.000     | 117 (7.06)                           | 85 (5.09)                  | 0.083     |
| Breast conserving surgery       | 653 (38.69)                          | 691 (40.34)                | 0.034     | 700 (42.23)                          | 716 (42.87)                | 0.013     |
| Mastectomy                      | 999 (59.21)                          | 986 (57.56)                | 0.033     | 840 (50.71)                          | 869 (52.04)                | 0.027     |
| <b>Health insurance</b>         |                                      |                            |           |                                      |                            |           |
| Private/military                | 1,276 (75.61)                        | 1,304 (76.12)              | 0.012     | 971 (58.61)                          | 1,089 (65.21)              | 0.136     |
| Uninsured/Medicaid              | 154 (9.13)                           | 113 (6.60)                 | 0.094     | 446 (26.89)                          | 326 (19.52)                | 0.175     |
| Medicare                        | 258 (15.26)                          | 296 (17.28)                | 0.055     | 240 (14.5)                           | 255 (15.27)                | 0.022     |
| <b>SES Index*</b>               |                                      |                            |           |                                      |                            |           |
| 0–<10%                          | 1,113 (65.98)                        | 1,023 (59.72)              | 0.130     | 364 (22)                             | 313 (18.74)                | 0.081     |
| 10%+                            | 574 (34.02)                          | 690 (40.28)                | 0.130     | 1,293 (78)                           | 1,357 (81.26)              | 0.081     |
| <b>Estrogen receptor status</b> |                                      |                            |           |                                      |                            |           |
| Negative                        | 418 (24.74)                          | 418 (24.4)                 | 0.008     | 718 (43.31)                          | 599 (35.87)                | 0.153     |
| Positive/borderline             | 1,270 (75.26)                        | 1,295 (75.6)               | 0.008     | 939 (56.69)                          | 1,071 (64.13)              | 0.153     |
| <b>Nodal involvement</b>        |                                      |                            |           |                                      |                            |           |
| No                              | 830 (49.21)                          | 878 (51.26)                | 0.041     | 821 (49.54)                          | 825 (49.4)                 | 0.003     |
| Yes                             | 857 (50.79)                          | 835 (48.74)                | 0.041     | 836 (50.46)                          | 845 (50.6)                 | 0.003     |
| Age, years                      | 53.29 (9.98)                         | 54.14 (11.27)              | 0.080     | 51.03 (15.52)                        | 52.53 (11.41)              | 0.110     |

All variables are summarized using frequencies and column percent except for age, which is summarized using means and standard deviations. \*, percentage of census tract at or below the federal poverty line. Std. Diff, standardized difference; SES, socioeconomic status.

**Table S2** Comparison of selected baseline characteristics between participants who received and did not receive hormone therapy within strata of race/ethnicity in the propensity score weighted cohort

| Variable                  | Non-Hispanic White           |                               |           | Non-Hispanic Black           |                               |           |
|---------------------------|------------------------------|-------------------------------|-----------|------------------------------|-------------------------------|-----------|
|                           | No hormone therapy (N=4,677) | Yes hormone therapy (N=4,629) | Std. Diff | No hormone therapy (N=4,677) | Yes hormone therapy (N=4,629) | Std. Diff |
| <b>Stage</b>              |                              |                               |           |                              |                               |           |
| I                         | 1,612 (54.66)                | 1,605 (55.52)                 | 0.017     | 737 (42.67)                  | 762 (43.84)                   | 0.024     |
| II                        | 1,018 (34.53)                | 942 (32.58)                   | 0.041     | 617 (35.7)                   | 638 (36.71)                   | 0.021     |
| III                       | 193 (6.53)                   | 242 (8.37)                    | 0.070     | 196 (11.33)                  | 216 (12.43)                   | 0.034     |
| IV                        | 126 (4.28)                   | 102 (3.53)                    | 0.039     | 178 (10.3)                   | 122 (7.02)                    | 0.117     |
| <b>Surgery</b>            |                              |                               |           |                              |                               |           |
| None                      | 140 (4.74)                   | 125 (4.32)                    | 0.020     | 129 (7.47)                   | 128 (7.36)                    | 0.004     |
| Breast conserving surgery | 1,538 (52.16)                | 1,579 (54.62)                 | 0.049     | 792 (45.81)                  | 877 (50.46)                   | 0.093     |
| Mastectomy                | 1,271 (43.1)                 | 1,187 (41.06)                 | 0.041     | 807 (46.73)                  | 733 (42.17)                   | 0.092     |
| <b>Health insurance</b>   |                              |                               |           |                              |                               |           |
| Private/military          | 25 (0.85)                    | 27 (0.93)                     | 0.009     | 69 (3.97)                    | 49 (2.82)                     | 0.064     |
| Uninsured                 | 1,958 (66.37)                | 1,892 (65.44)                 | 0.020     | 994 (57.52)                  | 1,011 (58.17)                 | 0.013     |
| Medicaid                  | 82 (2.79)                    | 72 (2.49)                     | 0.019     | 239 (13.86)                  | 226 (13.0)                    | 0.025     |
| Medicare                  | 884 (29.99)                  | 900 (31.13)                   | 0.025     | 426 (24.66)                  | 452 (26.01)                   | 0.031     |
| <b>SES Index*</b>         |                              |                               |           |                              |                               |           |
| 0<-5%                     | 922 (31.27)                  | 909 (31.44)                   | 0.004     | 95 (5.48)                    | 99 (5.7)                      | 0.009     |
| 5-10%                     | 942 (31.94)                  | 881 (30.47)                   | 0.032     | 201 (11.62)                  | 220 (12.66)                   | 0.032     |
| 10-20%                    | 755 (25.62)                  | 736 (25.46)                   | 0.004     | 641 (37.12)                  | 639 (36.77)                   | 0.007     |
| 20-100%                   | 330 (11.18)                  | 365 (12.63)                   | 0.045     | 791 (45.78)                  | 780 (44.88)                   | 0.018     |
| <b>Chemotherapy</b>       |                              |                               |           |                              |                               |           |
| No/discordant             | 1,834 (62.18)                | 1,825 (63.13)                 | 0.020     | 782 (45.25)                  | 842 (48.45)                   | 0.064     |
| Yes                       | 1,115 (37.82)                | 1,066 (36.87)                 | 0.020     | 946 (54.75)                  | 896 (51.55)                   | 0.064     |
| <b>Radiation</b>          |                              |                               |           |                              |                               |           |
| No/discordant             | 956 (32.41)                  | 979 (33.86)                   | 0.031     | 563 (32.59)                  | 547 (31.47)                   | 0.024     |
| Yes                       | 1,993 (67.59)                | 1,912 (66.14)                 | 0.031     | 1,165 (67.41)                | 1,191 (68.53)                 | 0.024     |
| <b>Subtype</b>            |                              |                               |           |                              |                               |           |
| Luminal A                 | 2,599 (88.14)                | 2,531 (87.55)                 | 0.018     | 1,449 (83.87)                | 1,443 (83.03)                 | 0.023     |
| Luminal B                 | 332 (11.25)                  | 342 (11.83)                   | 0.018     | 251 (14.55)                  | 268 (15.42)                   | 0.024     |
| HER2-enriched             | 8 (0.27)                     | 8 (0.28)                      | 0.001     | 10 (0.59)                    | 10 (0.58)                     | 0.002     |
| Triple negative           | 10 (0.34)                    | 10 (0.35)                     | 0.001     | 17 (0.99)                    | 17 (0.98)                     | 0.002     |
| Age                       | 59.29 (19.67)                | 59.66 (12.54)                 | 0.023     | 56.55 (15.62)                | 57.08 (12.76)                 | 0.037     |

All variables are summarized using frequencies and column percent except for age, which is summarized using means and standard deviations. \*, percentage of census tract at or below the federal poverty line. Std. Diff, standardized difference; SES, socioeconomic status.

**Table S3** Comparison of selected baseline characteristics between participants who received and did not receive trastuzumab within strata of race/ethnicity in the propensity score weighted cohort

| Variable                  | Non-Hispanic White        |                            |           | Non-Hispanic Black        |                            |           |
|---------------------------|---------------------------|----------------------------|-----------|---------------------------|----------------------------|-----------|
|                           | No Trastuzumab<br>(N=924) | Yes Trastuzumab<br>(N=925) | Std. Diff | No Trastuzumab<br>(N=924) | Yes Trastuzumab<br>(N=925) | Std. Diff |
| <b>Stage</b>              |                           |                            |           |                           |                            |           |
| I                         | 170 (35.28)               | 170 (35.27)                | 0.000     | 86 (19.47)                | 104 (23.48)                | 0.098     |
| II                        | 177 (36.68)               | 203 (42.12)                | 0.111     | 204 (46.16)               | 194 (43.79)                | 0.048     |
| III                       | 103 (21.3)                | 76 (15.77)                 | 0.143     | 93 (20.99)                | 92 (20.77)                 | 0.006     |
| IV                        | 32 (6.75)                 | 33 (6.85)                  | 0.004     | 59 (13.38)                | 53 (11.96)                 | 0.043     |
| <b>Surgery</b>            |                           |                            |           |                           |                            |           |
| None                      | 27 (5.57)                 | 30 (6.22)                  | 0.028     | 89 (20.03)                | 59 (13.32)                 | 0.181     |
| Breast conserving surgery | 176 (36.55)               | 166 (34.44)                | 0.044     | 152 (34.42)               | 153 (34.54)                | 0.002     |
| Mastectomy                | 279 (57.88)               | 286 (59.34)                | 0.030     | 201 (45.55)               | 231 (52.14)                | 0.132     |
| <b>Health insurance</b>   |                           |                            |           |                           |                            |           |
| Private/military          | 4 (0.88)                  | 5 (1.04)                   | 0.016     | 24 (5.45)                 | 14 (3.16)                  | 0.113     |
| Uninsured                 | 369 (76.64)               | 357 (74.07)                | 0.060     | 254 (57.51)               | 278 (62.75)                | 0.107     |
| Medicaid                  | 22 (4.61)                 | 25 (5.19)                  | 0.027     | 83 (18.82)                | 81 (18.28)                 | 0.014     |
| Medicare                  | 86 (17.86)                | 95 (19.71)                 | 0.047     | 81 (18.22)                | 70 (15.8)                  | 0.064     |
| <b>SES Index*</b>         |                           |                            |           |                           |                            |           |
| 0-<5%                     | 117 (24.35)               | 135 (28.01)                | 0.083     | 26 (5.97)                 | 27 (6.09)                  | 0.005     |
| 5-10%                     | 158 (32.75)               | 147 (30.5)                 | 0.049     | 58 (13.03)                | 52 (11.74)                 | 0.039     |
| 10-20%                    | 145 (30.2)                | 134 (27.8)                 | 0.053     | 183 (41.45)               | 177 (39.95)                | 0.030     |
| 20-100%                   | 61 (12.7)                 | 66 (13.69)                 | 0.029     | 175 (39.56)               | 187 (42.21)                | 0.054     |
| <b>Chemotherapy</b>       |                           |                            |           |                           |                            |           |
| No/discordant             | 25 (5.24)                 | 25 (5.19)                  | 0.003     | 29 (6.57)                 | 29 (6.55)                  | 0.001     |
| Yes                       | 456 (94.76)               | 457 (94.81)                | 0.003     | 413 (93.43)               | 414 (93.45)                | 0.001     |
| <b>Radiation</b>          |                           |                            |           |                           |                            |           |
| No/discordant             | 162 (33.58)               | 189 (39.21)                | 0.117     | 153 (34.61)               | 160 (36.12)                | 0.032     |
| Yes                       | 320 (66.42)               | 293 (60.79)                | 0.117     | 289 (65.39)               | 283 (63.88)                | 0.032     |
| <b>Subtype</b>            |                           |                            |           |                           |                            |           |
| Luminal A                 | 30 (6.25)                 | 30 (6.22)                  | 0.001     | 28 (6.35)                 | 28 (6.32)                  | 0.001     |
| Luminal B                 | 340 (70.6)                | 342 (70.95)                | 0.008     | 269 (60.82)               | 285 (64.33)                | 0.073     |
| HER2-enriched             | 101 (20.89)               | 99 (20.54)                 | 0.009     | 136 (30.81)               | 121 (27.31)                | 0.077     |
| Triple negative           | 11 (2.26)                 | 11 (2.28)                  | 0.001     | 9 (2.03)                  | 9 (2.03)                   | 0.000     |
| Age                       | 55.09 (4.08)              | 55.07 (12.71)              | 0.002     | 52.72 (4.86)              | 52.14 (12.03)              | 0.063     |

All variables are summarized using frequencies and column percent except for age, which is summarized using means and standard deviations. \*, percentage of census tract at or below the federal poverty line. Std. Diff, standardized difference; SES, socioeconomic status.

**Table S4** Comparison of selected baseline characteristics between participants who received and did not receive radiation therapy within strata of race/ethnicity in the propensity score weighted cohort

| Variable                  | Non-Hispanic White        |                            |           | Non-Hispanic Black        |                            |           |
|---------------------------|---------------------------|----------------------------|-----------|---------------------------|----------------------------|-----------|
|                           | No radiation<br>(N=8,400) | Yes radiation<br>(N=4,418) | Std. Diff | No radiation<br>(N=8,400) | Yes radiation<br>(N=4,418) | Std. Diff |
| <b>Stage</b>              |                           |                            |           |                           |                            |           |
| I                         | 1,017 (18.34)             | 1,474 (57.07)              | 0.872     | 569 (19.92)               | 749 (40.82)                | 0.467     |
| II                        | 1,531 (27.6)              | 745 (28.84)                | 0.028     | 931 (32.63)               | 680 (37.06)                | 0.093     |
| III                       | 1,520 (27.42)             | 285 (11.03)                | 0.425     | 832 (29.16)               | 299 (16.29)                | 0.311     |
| IV                        | 1,477 (26.64)             | 79 (3.06)                  | 0.703     | 522 (18.29)               | 107 (5.83)                 | 0.390     |
| <b>Surgery</b>            |                           |                            |           |                           |                            |           |
| None                      | 69 (1.24)                 | 56 (2.17)                  | 0.072     | 74 (2.59)                 | 70 (3.81)                  | 0.069     |
| Breast conserving surgery | 4,997 (90.1)              | 1,999 (77.39)              | 0.350     | 2,309 (80.9)              | 1,228 (66.92)              | 0.322     |
| Mastectomy                | 480 (8.66)                | 528 (20.44)                | 0.339     | 471 (16.51)               | 537 (29.26)                | 0.307     |
| <b>Health insurance</b>   |                           |                            |           |                           |                            |           |
| Private/military          | 456 (8.22)                | 28 (1.08)                  | 0.344     | 164 (5.74)                | 58 (3.16)                  | 0.125     |
| Uninsured                 | 3,459 (62.37)             | 1,695 (65.62)              | 0.068     | 1,593 (55.82)             | 1,091 (59.46)              | 0.074     |
| Medicaid                  | 164 (2.96)                | 76 (2.94)                  | 0.001     | 428 (15.01)               | 275 (14.99)                | 0.001     |
| Medicare                  | 1,467 (26.45)             | 784 (30.35)                | 0.087     | 669 (23.43)               | 411 (22.4)                 | 0.025     |
| <b>SES Index</b>          |                           |                            |           |                           |                            |           |
| 0–<5%                     | 1,726 (31.11)             | 808 (31.28)                | 0.004     | 69 (2.41)                 | 120 (6.54)                 | 0.201     |
| 5–10%                     | 2,045 (36.88)             | 776 (30.04)                | 0.145     | 265 (9.28)                | 233 (12.7)                 | 0.109     |
| 10–20%                    | 765 (13.79)               | 690 (26.71)                | 0.326     | 1,200 (42.05)             | 680 (37.06)                | 0.102     |
| 20–100%                   | 1,010 (18.22)             | 309 (11.96)                | 0.175     | 1,320 (46.25)             | 802 (43.71)                | 0.051     |
| <b>Chemotherapy</b>       |                           |                            |           |                           |                            |           |
| No/discordant             | 1,685 (30.38)             | 1,448 (56.06)              | 0.537     | 681 (23.84)               | 639 (34.82)                | 0.243     |
| Yes                       | 3,861 (69.62)             | 1,135 (43.94)              | 0.537     | 2,174 (76.16)             | 1,196 (65.18)              | 0.243     |
| <b>Subtype</b>            |                           |                            |           |                           |                            |           |
| Luminal A                 | 4,010 (72.31)             | 2,010 (77.82)              | 0.128     | 1,732 (60.69)             | 1,170 (63.76)              | 0.063     |
| Luminal B                 | 1,088 (19.62)             | 286 (11.07)                | 0.239     | 449 (15.75)               | 231 (12.59)                | 0.091     |
| HER2-enriched             | 189 (3.4)                 | 76 (2.94)                  | 0.026     | 169 (5.91)                | 85 (4.63)                  | 0.057     |
| Triple negative           | 259 (4.67)                | 211 (8.17)                 | 0.143     | 504 (17.65)               | 349 (19.02)                | 0.036     |
| Age                       | 57.17 (28.65)             | 59.38 (11.81)              | 0.101     | 56.37 (19.29)             | 55.86 (11.67)              | 0.031     |

All variables are summarized using frequencies and column percent except for age, which is summarized using means and standard deviations. \*, percentage of census tract at or below the federal poverty line. Std. Diff, standardized difference; SES, socioeconomic status.

**Table S5** Number of cardiovascular disease-related deaths according to therapy received and race/ethnicity among women diagnosed with stage I-IV breast cancer in the metropolitan Atlanta area

| Therapy         | No. of CVD deaths  |                    |
|-----------------|--------------------|--------------------|
|                 | Non-Hispanic White | Non-Hispanic Black |
| Chemotherapy    |                    |                    |
| Yes             | 15                 | 17                 |
| No/discordant   | 82                 | 49                 |
| Hormone therapy |                    |                    |
| Yes             | 55                 | 40                 |
| No              | 44                 | 25                 |
| Trastuzumab     |                    |                    |
| Yes             | 6                  | 3                  |
| No              | 96                 | 67                 |

**Table S6** Subdistribution hazard ratios (sdHR) and 95% confidence intervals (95% CI) for cardiovascular disease-specific death overall and according to race among women diagnosed with stage I-IV breast cancer in the metropolitan Atlanta area

| Treatment           | sdHR (95% CI)     |                    |                    |
|---------------------|-------------------|--------------------|--------------------|
|                     | Overall           | Non-Hispanic White | Non-Hispanic Black |
| Chemotherapy*       |                   |                    |                    |
| Yes                 | 1.20 (0.66, 2.17) | 0.94 (0.41, 2.14)  | 1.57 (0.65, 3.77)  |
| No/discordant       | Reference         | Reference          | Reference          |
| Interaction P value |                   | 0.40               |                    |
| Hormone therapy†    |                   |                    |                    |
| Yes                 | 0.94 (0.70, 1.26) | 0.65 (0.45, 0.94)  | 2.25 (1.27, 3.97)  |
| No/discordant       | Reference         | Reference          | Reference          |
| Interaction P value |                   | ≤0.01              |                    |
| Trastuzumab†        |                   |                    |                    |
| Yes                 | 2.10 (0.56, 7.89) | Not estimable      |                    |
| No/unknown          | Reference         |                    |                    |

Estimates for radiation therapy were unreliable and therefore excluded from this analysis. \*, propensity score model included: age, stage, surgery, radiation therapy, insurance status, poverty level, estrogen receptor, node status, and race, as well as interaction terms between race and all variables in the model; †, propensity score models included: age, stage, surgery, radiation therapy, insurance status, poverty level, subtype, chemotherapy and race, as well as interaction terms between race and all variables in the model.

**Table S7** Hazard ratios (HR) and 95% confidence intervals (95%CI) for cardiovascular disease-specific death overall and according to race among women diagnosed with stage I–III breast cancer in the metropolitan Atlanta area

| Treatment               | HR (95% CI)       |                    |                    |
|-------------------------|-------------------|--------------------|--------------------|
|                         | Overall           | Non-Hispanic White | Non-Hispanic Black |
| <b>Chemotherapy*</b>    |                   |                    |                    |
| Yes                     | 1.17 (0.66, 2.07) | 0.97 (0.45, 2.06)  | 1.41 (0.58, 3.40)  |
| No/discordant           | Reference         | Reference          | Reference          |
| Interaction P value     |                   | 0.61               |                    |
| <b>Hormone therapy†</b> |                   |                    |                    |
| Yes                     | 0.99 (0.62, 1.59) | 0.75 (0.44, 1.27)  | 1.99 (0.67, 5.94)  |
| No/discordant           | Reference         | Reference          | Reference          |
| Interaction P value     |                   | 0.11               |                    |
| <b>Trastuzumab†</b>     |                   |                    |                    |
| Yes                     | 2.24 (0.87, 5.78) | Not estimable      |                    |
| No/unknown              | Reference         |                    |                    |

Estimates for radiation therapy were unreliable and therefore excluded from this analysis. \*, propensity score model included: age, stage, surgery, radiation therapy, insurance status, poverty level, estrogen receptor, node status, and race, as well as interaction terms between race and all variables in the model; †, propensity score models included: age, stage, surgery, radiation therapy, insurance status, poverty level, subtype, chemotherapy and race, as well as interaction terms between race and all variables in the model.
